# Supplementary material for: Synthesis and characterization of a ZrO2/g-C3N4 composite with enhanced visible-light photoactivity for rhodamine degradation
Source: Royal Society of Chemistry journal article supplement (doi:10.1039/c4ra06035k), 2014-01-01
Supplement: c4ra06035k1.pdf [file c4ra06035k1.pdf]

## Supplementary Materials

Synthesis and characterization of  $\text{ZrO}_2/\text{g-C}_3\text{N}_4$  composite with enhanced visible-light photoactivity for rhodamine degradation

Xiaoxing Wang<sup>a</sup>, Lihong Zhang<sup>a</sup>, Hongjun Lin<sup>c</sup>, Qinyan Nong<sup>a</sup>, Ying Wu<sup>\*b</sup>, Tinghua Wu<sup>b</sup> and Yiming He<sup>\*a</sup>

<sup>a</sup> Department of Materials Physics, Zhejiang Normal University, Jinhua, 321004, China

<sup>b</sup> Institute of Physical Chemistry, Zhejiang Normal University, Jinhua, 321004, China

<sup>c</sup> College of Geography and Environmental Sciences, Zhejiang Normal University, Jinhua, 321004, China

Corresponding author: Tel: +86-0579-83792294; Fax: +86-0579-83714946; E-mail:

*hym@zjnu.cn* (Y. He); *ying-wu@zjnu.cn* (Y. Wu)

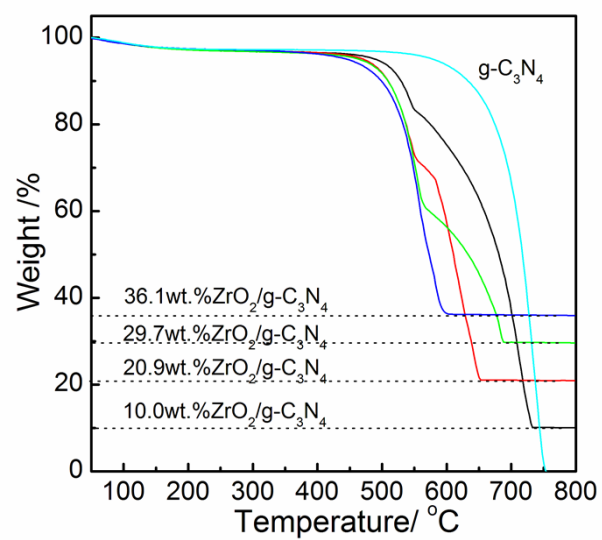

**Fig. S1** TG profiles of pure  $\text{g-C}_3\text{N}_4$  and  $\text{ZrO}_2/\text{g-C}_3\text{N}_4$  composite.
